# Supplementary material
Source: Springer Nature journal article supplement (https://www.springermedizin.de/resource/supplementary/12943_2009_643_MOESM7_ESM.pdf/9554468)
Supplement: MOESM7 [file 9554468]

A

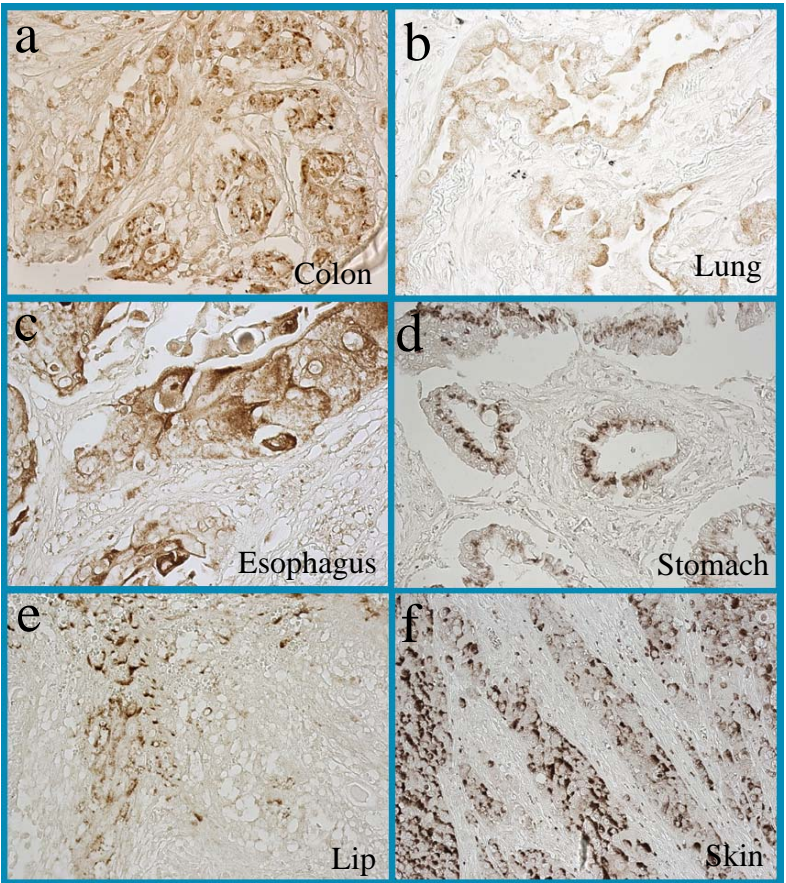

B

| Types of cancer     | VHZ +/-total samples | VHZ +% |
|---------------------|----------------------|--------|
| Colon               | 25/143               | 17.5%  |
| Lung                | 20/82                | 24.0%  |
| *Squamous carcinoma | 22/63                | 35.0%  |
| Pancreas            | 17/51                | 33.3%  |
| Brain               | 7/40                 | 17.5%  |
| Esophagus           | 4/12                 | 33.3%  |
| Stomach             | 5/14                 | 35.7%  |
| Bladder             | 2/6                  | 33.3%  |
| Kidney              | 2/11                 | 18.1%  |
| Skin                | 2/6                  | 33.3%  |
| Ovary               | 2/6                  | 33.3%  |
| Prostate            | 3/8                  | 37.5%  |
| Testis              | 2/6                  | 33.3%  |
